# Supplementary material
Source: MDPI journal article supplement (https://www.mdpi.com/2077-0472/12/9/1451)
Supplement: s1 [file s1]

**Table S1: Soil properties of collected sodic soil**

| Parameters       | Trichy |       |       | Chinna Salem |      |
|------------------|--------|-------|-------|--------------|------|
|                  | L1     | L2    | L3    | L4           | L5   |
| pH               | 8.78   | 8.61  | 8.54  | 9.2          | 8.7  |
| EC               | 0.172  | 0.152 | 0.125 | 1.36         | 1.45 |
| ESP              | 15.38  | 15.39 | 15.04 | 24.54        | 16   |
| HCO <sub>3</sub> | 0.99   | 0.95  | 0.85  | 2.58         | 2.69 |
| CO <sub>3</sub>  | 0.00   | 0.00  | 0.01  | 0.02         | 0.02 |

L1, L2, L3,L4, L5- Soil sampling locations, EC- Electrical conductivity (dSm<sup>-1</sup>), ESP- Exchangeable sodium percentage (%),CO<sub>3</sub><sup>2-</sup> & HCO<sub>3</sub><sup>-</sup> (g kg<sup>-1</sup>).

**Table S2: Bacteria isolated from the rhizosphere of rice under sodic soils**

| Isolate details | Closest match                            | Homology (%) | Length of sequence (bp) | NCBI Genebank accession number |
|-----------------|------------------------------------------|--------------|-------------------------|--------------------------------|
| L3C9N           | <i>Rhodococcus pyridinivorans</i> SB3094 | 99.58        | 1429                    | OM392062                       |
| L3C1L           | <i>Priestia flexa</i> NE09               | 100          | 1458                    | OM392063                       |
| L4C1L           | <i>Stenotrophomonas</i> sp. LSB20        | 89.20        | 1442                    | OM584324                       |
| L5C1L           | <i>Bacillus cabrialesii</i> NOK82        | 99.58        | 1459                    | OM392064                       |
| L2C3L           | <i>Bacillus velezensis</i> VMFR18        | 99.52        | 1458                    | OM421749                       |
| L5C2L           | <i>Bacillus altitudinis</i> VMFR18       | 99.24        | 1452                    | OM421787                       |
| L3C2L           | <i>Lysinibacillus</i> sp. NE12           | 92.49        | 1452                    | OM604753                       |
| L5C3L           | <i>Lysinibacillus fusiformis</i> NE12    | 99.86        | 1457                    | OM421788                       |
| L5C4L           | <i>Bacillus paramycoides</i> LU6         | 98.00        | 1455                    | OM421789                       |
| L2C5L           | <i>Bacillus velezensis</i> T49           | 99.72        | 1455                    | OM421790                       |
| L1C4L           | <i>Cytobacillus firmus</i> xmb003        | 99.59        | 1457                    | OM421791                       |
| L1C5L           | <i>Bacillus paralicheniformis</i> KLV27  | 98.97        | 1459                    | OM421792                       |
| L4C3L           | <i>Bacillus cabrialesii</i> TE3          | 99.58        | 1455                    | OM422610                       |
| L4C4L           | <i>Bacillus paramycoides</i> LU6         | 98.00        | 1454                    | OM422611                       |
| L4C6L           | <i>Ralstonia pickettii</i> B77           | 98.88        | 1440                    | OM422612                       |
| L5C8L           | <i>Arthrobacter</i> sp. BT82             | 97.88        | 1429                    | OM422613                       |
| L5C11L          | <i>Bacillus velezensis</i> LY9           | 99.45        | 1457                    | OM422614                       |
| L2C9L           | <i>Niallia circulans</i> KB-9            | 99.65        | 1457                    | OM422615                       |
| L5C11L          | <i>Achromobacter</i> sp. RABA7           | 84.70        | 1439                    | OM614587                       |
| L5C1T           | <i>Bacillus paramycoides</i> LU6         | 99.03        | 1453                    | OM422616                       |
| L2C2T           | <i>Staphylococcus</i> sp. Y41            | 95.50        | 1453                    | OM422617                       |
| L2C6T           | <i>Burkholderia territorii</i> CR1       | 98.31        | 1437                    | OM422618                       |
| L2C7T           | <i>Stenotrophomonas maltophilia</i> LH15 | 99.86        | 1450                    | OM422619                       |

|         |                                      |       |      |          |
|---------|--------------------------------------|-------|------|----------|
| L4C4T   | <i>Bacillus paramycoides</i> LU6     | 98.63 | 1455 | OM422620 |
| L2C12T  | <i>Bacillus altitudinis</i> SH91     | 99.59 | 1457 | OM422621 |
| L3C2T   | <i>Bacillus stercoris</i> YBB10      | 99.72 | 1455 | OM422622 |
| L3C3T   | <i>Bacillus</i> sp. MBG31            | 83.31 | 1464 | OM422623 |
| L1C5T   | <i>Bacillus cabrialesii</i> NOK82    | 99.52 | 1459 | OM422624 |
| L5C13T  | <i>Bacillus safensis</i> NS-5        | 99.52 | 1455 | OM422625 |
| L5C14T  | <i>Pseudomonas</i> sp. FX03          | 93.48 | 1464 | OM486948 |
| L4C7T   | <i>Burkholderia</i> sp. JCM5506      | 94.56 | 1455 | OM422626 |
| L1C7T   | <i>Bacillus rugosus</i> SPB70        | 99.72 | 1457 | OM422627 |
| L3C6T   | <i>Bacillus tequilensis</i> AQ10     | 99.59 | 1457 | OM422628 |
| L2C2R   | <i>Kocuria</i> sp. NA31              | 92.97 | 1442 | OM615903 |
| L3C1L2  | <i>Bacillus</i> sp. P241             | 84.20 | 1474 | OM616571 |
| L2C1L2  | <i>Franconibacter helveticus</i> L20 | 99.23 | 1446 | OM422629 |
| L3C2L2  | <i>Planococcus</i> sp. CW1           | 92.93 | 1469 | OM614598 |
| L4C1L2  | <i>Bacillus paramycoides</i> LU6     | 98.83 | 1458 | OM422630 |
| L2C2L2  | <i>Bacillus zanthoxyli</i> Q231      | 99.73 | 1458 | OM422631 |
| L3C4L2  | <i>Bacillus paramycoides</i> LU6     | 99.16 | 1455 | OM422632 |
| L5C6L2  | <i>Acinetobacter</i> sp. S9          | 97.27 | 1441 | OM422633 |
| L4C1R2  | <i>Stenotrophomonas</i> sp. LSB20    | 94.88 | 1478 | OM422634 |
| L1C1T2  | <i>Bacillus coreaensis</i> GC317     | 97.99 | 1450 | OM422635 |
| L5C2T2  | <i>Bacillus velezensis</i> T49       | 99.72 | 1455 | OM422636 |
| L1C9T2  | <i>Achromobacter</i> sp. S15         | 86.64 | 1439 | OM615901 |
| L3C3T2  | <i>Bacillus altitudinis</i> CE27     | 99.65 | 1454 | OM422637 |
| L3C7T2  | <i>Bacillus</i> sp. LU6              | 97.66 | 1456 | OM422638 |
| L1C10T2 | <i>Burkholderia</i> sp. KBB5         | 96.95 | 1445 | OM422639 |
| L5C3T2  | <i>Stenotrophomonas</i> sp. LSB20    | 94.88 | 1464 | OM422640 |
| L4C5T   | <i>Burkholderia</i> sp. KBB5         | 80.28 | 1447 | OM640465 |

**Table S3: Selection of Sodium sources**

| (pH) Before Autoclave | (Na <sub>2</sub> CO <sub>3</sub> -NaHCO <sub>3</sub> ) (pH) After Autoclave | (Na <sub>2</sub> CO <sub>3</sub> ) (pH) After Autoclave | (NaOH) (pH) After Autoclave |
|-----------------------|-----------------------------------------------------------------------------|---------------------------------------------------------|-----------------------------|
| 7.50                  | 7.97                                                                        | 7.50                                                    | 7.39                        |
| 8.00                  | 8.70                                                                        | 8.23                                                    | 7.86                        |
| 8.50                  | 9.58                                                                        | 8.87                                                    | 8.17                        |
| 9.00                  | 9.50                                                                        | 9.30                                                    | 8.56                        |
| 9.50                  | 9.85                                                                        | 9.65                                                    | 8.92                        |

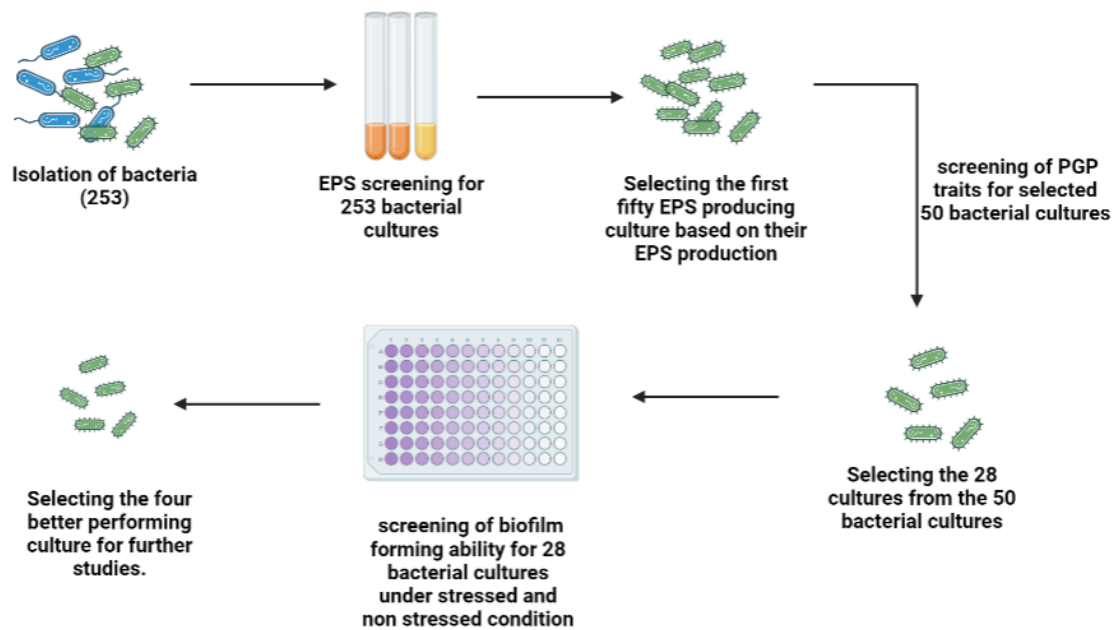

**Figure S1: Screening process for selecting the EPS producing sodic tolerant PGPR**

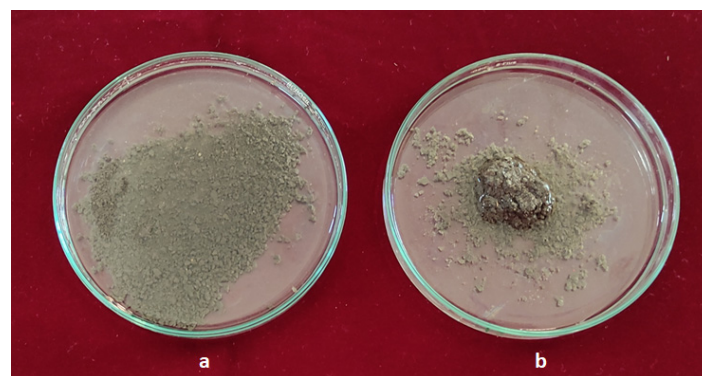

a- Control, b- Treatment (cell-free supernatant added)

**Figure S2: Aggregate formation in dispersed soil**

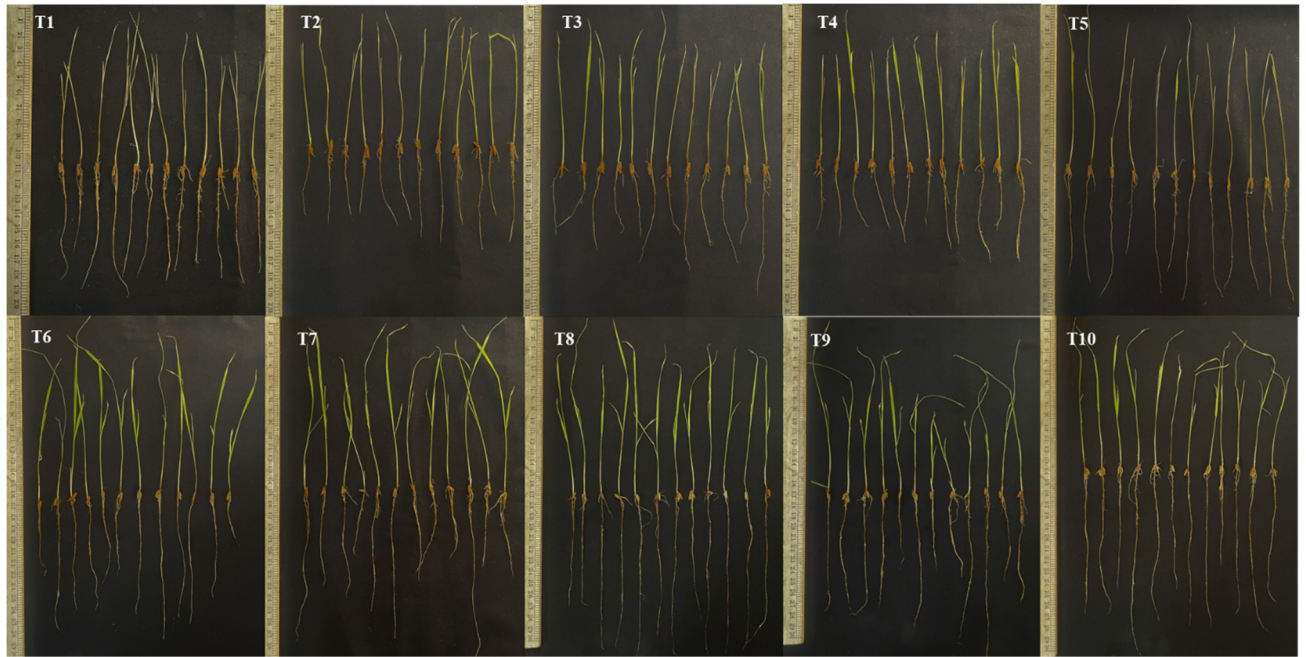

**Figure S3: Impact of bacterial inoculation on plant growth under sodic stress and unstress condition.** T1- Absolute control @70 SAR, T2- *Bacillus rugosus* L1C7T @70 SAR, T3- *Bacillus paralicheniformis* L1C5L @70 SAR, T4- *Pseudomonas* sp. L5C14T @70 SAR, T5- *Franconibacter helveticus* L2C1T2@70 SAR, T6 - Absolute control (unstressed), T7- *Bacillus rugosus* L1C7T, T8 - *Bacillus paralicheniformis* L1C5L, T9- *Pseudomonas* sp. L5C14T, and T10- *Franconibacter helveticus* L2C1T2.

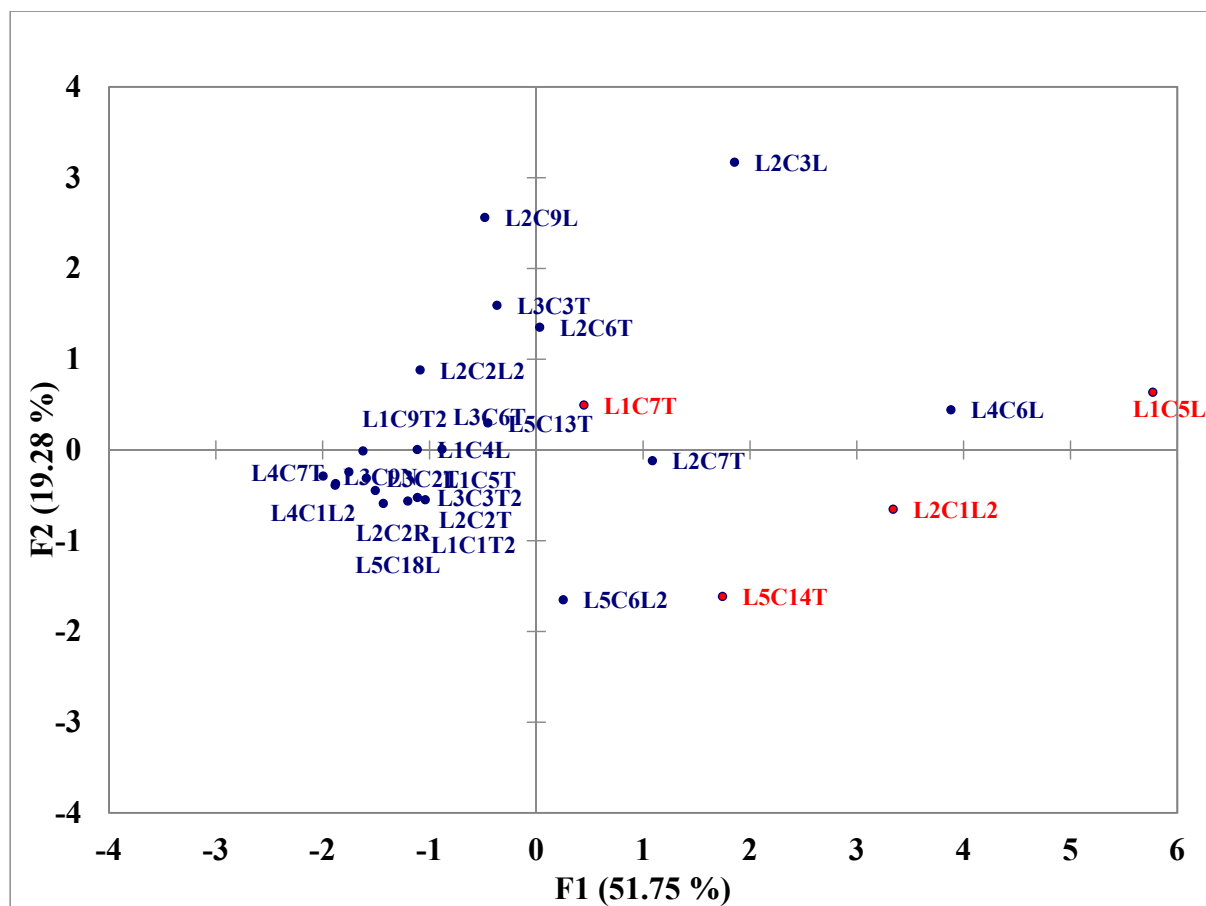

**Figure S4: Principal component analysis plots relating Biofilm forming ability, and EPS-sodic tolerance-bacterial isolates.**
